# Supplementary material
Source: PubMed Central journal article supplement (PMC3571675)
Supplement: NIHMS361177-supplement-01.pdf [file NIHMS361177-supplement-01.pdf]

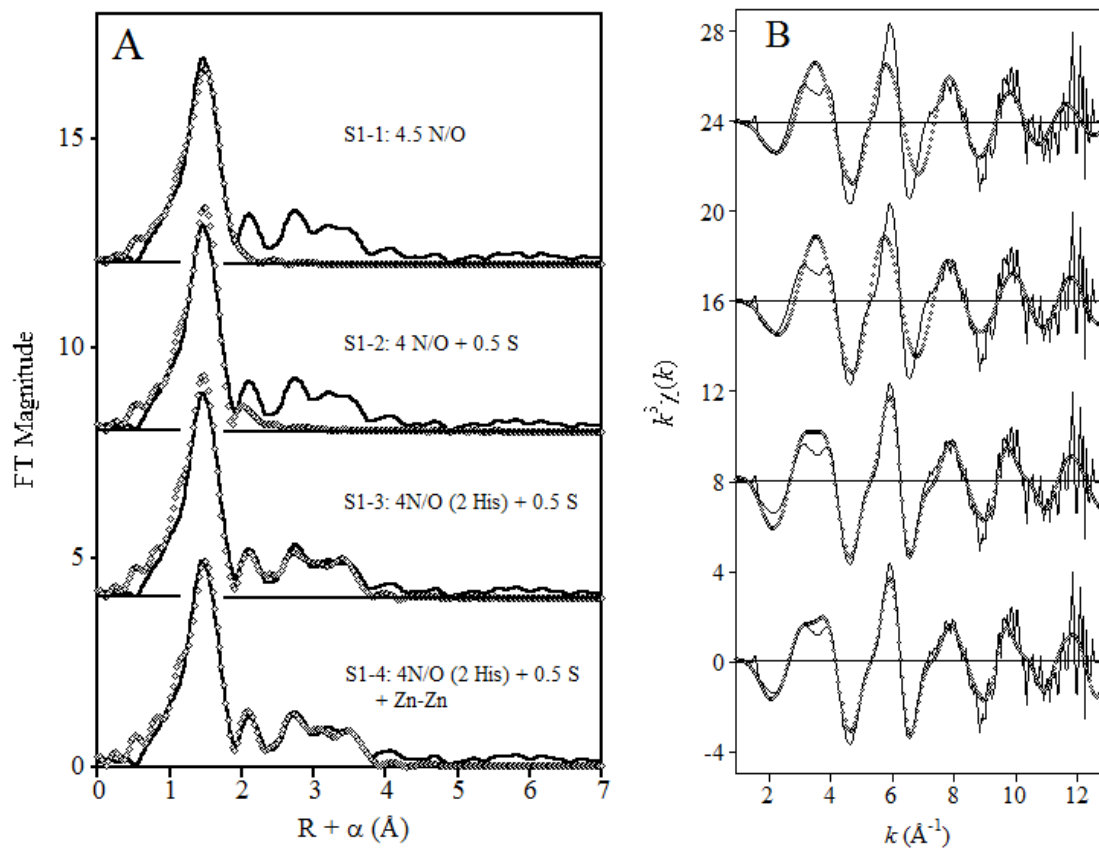

**Figure S1.** Fourier transforms (A) of  $k^3$ -weighted EXAFS (B) for 0.5Zn-BcII (solid lines), and corresponding curve fits (open symbols) from Table S1.

**Table S1.** Detailed EXAFS curve fitting results for 0.5Zn-BcII.<sup>a</sup>

| Fit  | Model                                              | Zn-N/O     | Zn-S       | Zn-His <sup>b</sup>                             | Zn-Zn      | R <sub>f</sub> <sup>c</sup> | R <sub>u</sub> <sup>c</sup> |
|------|----------------------------------------------------|------------|------------|-------------------------------------------------|------------|-----------------------------|-----------------------------|
| S1-1 | 4.5 N/O                                            | 2.05 (6.6) |            |                                                 |            | 113                         | 207                         |
| S1-2 | 4 N/O + 0.5 S                                      | 2.02 (4.9) | 2.30 (5.8) |                                                 |            | 71                          | 181                         |
| S1-3 | 4 N/O (2 His) + 0.5 S <sup>d</sup>                 | 2.02 (4.5) | 2.29 (6.3) | 2.93 (0.6), 3.18 (2.0)<br>4.11 (10), 4.43 (14)  |            | 34                          | 63                          |
| S1-4 | 4 N/O (3 His) + 0.5 S <sup>e</sup><br>+ Zn-Zn      | 2.02 (5.0) | 2.28 (8.0) | 2.95 (1.6), 3.21 (5.0)<br>4.12 (9.0), 4.41 (21) | 3.41 (13)  | 26                          | 53                          |
| S1-5 | 4 N/O (3 His) + 0.5 S<br>+ 0.12 Zn-Zn <sup>f</sup> | 2.02 (4.9) | 2.28 (7.8) | 2.94 (1.9), 3.21 (4.1)<br>4.12 (9.6), 4.41 (23) | 3.41 (8.6) | 28                          | 57                          |

<sup>a</sup> Distances (Å) and disorder parameters (in parentheses,  $\sigma^2$  ( $10^{-3} \text{Å}^2$ )) shown derive from integer or half-integer coordination number fits to filtered EXAFS data [ $k = 1.5\text{-}12.5 \text{Å}^{-1}$ ;  $R = 0.7\text{-}2.2 \text{Å}$  (fits 1-2) or  $0.2\text{-}4.2 \text{Å}$  (fits 3-5)].

<sup>b</sup> Multiple scattering paths represent combined paths, as described previously (see Materials and Methods).

<sup>c</sup> Goodness of fit (R<sub>f</sub> for fits to filtered data; R<sub>u</sub> for fits to unfiltered data) defined as

$$1000 * \frac{\sum_{i=1}^N \{ [\text{Re}(\chi_{i,obs})^2 + \text{Im}(\chi_{i,obs})^2] - [\text{Re}(\chi_{i,calc})^2 + \text{Im}(\chi_{i,calc})^2] \}}{\sum_{i=1}^N \{ \text{Re}(\chi_{i,obs})^2 + \text{Im}(\chi_{i,obs})^2 \}}$$

<sup>d</sup> Inclusion of a Zn-C scattering path (0.5 C/Zn), along with the parameters of this fit, led to a refined Zn-C distance of 2.49 Å ( $\sigma^2 = 5.4 \times 10^{-3} \text{Å}^2$ ), with a modest decrease in fit residual to R<sub>f</sub> = 25.

<sup>e</sup> Inclusion of a Zn-C scattering path (0.5 C/Zn), along with the parameters of this fit, led to a refined Zn-C distance of 2.50 Å ( $\sigma^2 = 5.1 \times 10^{-3} \text{Å}^2$ ), with a modest decrease in fit residual to R<sub>f</sub> = 18.

<sup>f</sup> This fit allowed the Zn-Zn coordination number to float (refining to a value of 0.12), as well as  $R$  and  $\sigma^2$ .

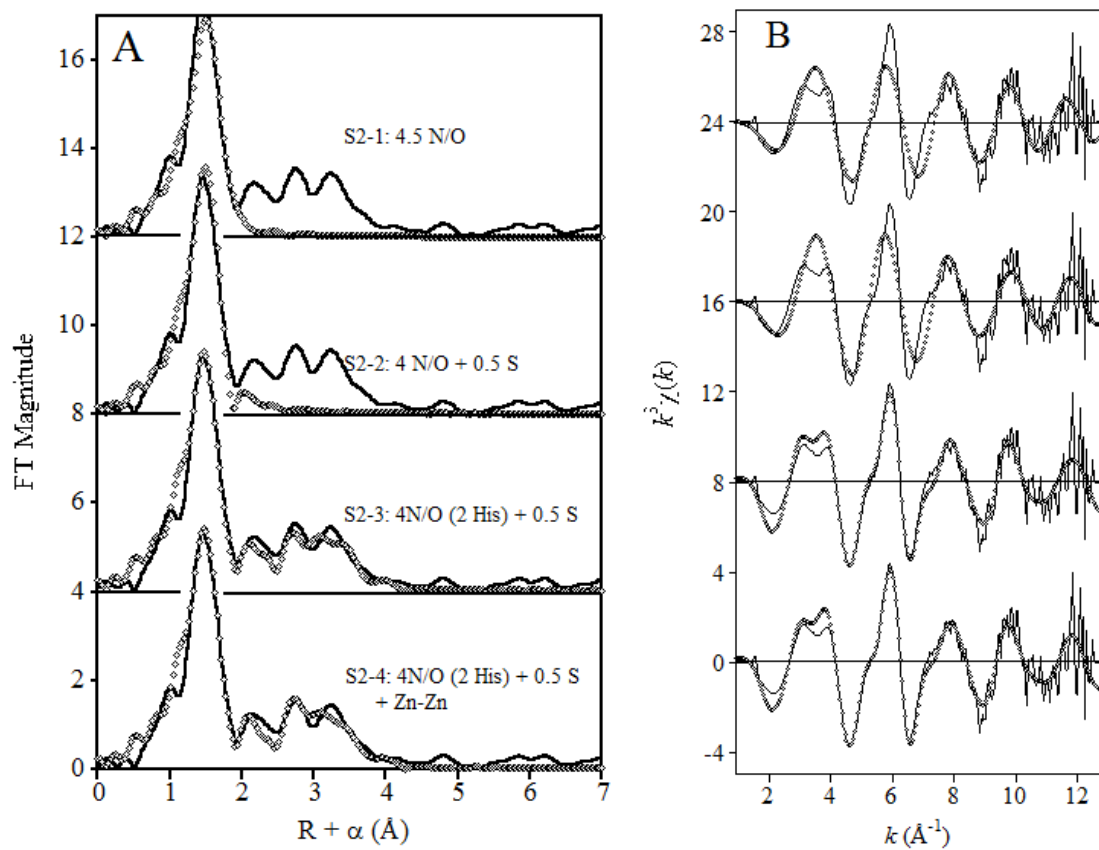

**Figure S2.** Fourier transforms (A) of  $k^3$ -weighted EXAFS (B) for 1Zn-BcII (solid lines), and corresponding curve fits (open symbols) from Table S5.

**Table S2.** Detailed EXAFS curve fitting results for 1Zn-BcII.<sup>a</sup>

| Fit  | Model                                              | Zn-N/O     | Zn-S       | Zn-His <sup>b</sup>                            | Zn-Zn      | R <sub>f</sub> <sup>c</sup> | R <sub>u</sub> <sup>c</sup> |
|------|----------------------------------------------------|------------|------------|------------------------------------------------|------------|-----------------------------|-----------------------------|
| S2-1 | 4.5 N/O                                            | 2.05 (4.6) |            |                                                |            | 109                         | 294                         |
| S2-2 | 4 N/O + 0.5 S                                      | 2.03 (5.0) | 2.28 (6.3) |                                                |            | 70                          | 261                         |
| S2-3 | 4 N/O (2 His) + 0.5 S <sup>d</sup>                 | 2.03 (4.5) | 2.28 (6.3) | 2.93 (0.6), 3.18 (2.0)<br>4.08 (12), 4.44 (14) |            | 44                          | 139                         |
| S2-4 | 4 N/O (3 His) + 0.5 S<br>+ Zn-Zn                   | 2.03 (6.6) | 2.28 (6.0) | 2.93 (0.6), 3.18 (2.0)<br>4.08 (13), 4.44 (14) | 3.41 (10)  | 31                          | 46                          |
| S2-5 | 4 N/O (3 His) + 0.5 S<br>+ 0.30 Zn-Zn <sup>e</sup> | 2.03 (6.7) | 2.28 (6.3) | 2.93 (0.4), 3.17 (1.5)<br>4.08 (12), 4.44 (13) | 3.41 (8.7) | 29                          | 44                          |

<sup>a</sup> Distances (Å) and disorder parameters (in parentheses,  $\sigma^2$  ( $10^{-3}$  Å<sup>2</sup>)) shown derive from integer or half-integer coordination number fits to filtered EXAFS data [ $k = 1.5$ - $12.5$  Å<sup>-1</sup>;  $R = 0.7$ - $2.2$  Å (fits 1-2) or  $0.2$ - $4.2$  Å (fits 3-5)].

<sup>b</sup> Multiple scattering paths represent combined paths, as described previously (see Materials and Methods).

<sup>c</sup> Goodness of fit (R<sub>f</sub> for fits to filtered data; R<sub>u</sub> for fits to unfiltered data) defined as

$$1000 * \frac{\sum_{i=1}^N \{ [\text{Re}(\chi_{i,obs})^2 + \text{Im}(\chi_{i,obs})^2] - [\text{Re}(\chi_{i,calc})^2 + \text{Im}(\chi_{i,calc})^2] \}}{\sum_{i=1}^N \{ \text{Re}(\chi_{i,obs})^2 + \text{Im}(\chi_{i,obs})^2 \}}$$

<sup>d</sup> Inclusion of a Zn-C scattering path (0.5 C/Zn), along with the parameters of this fit, led to a refined Zn-C distance of 2.50 Å ( $\sigma^2 = 16 \times 10^{-3}$  Å<sup>2</sup>), with a modest decrease in fit residual to R<sub>f</sub> = 39.

<sup>e</sup> This fit allowed the Zn-Zn coordination number to float (refining to a value of 0.30), as well as  $R$  and  $\sigma^2$ .

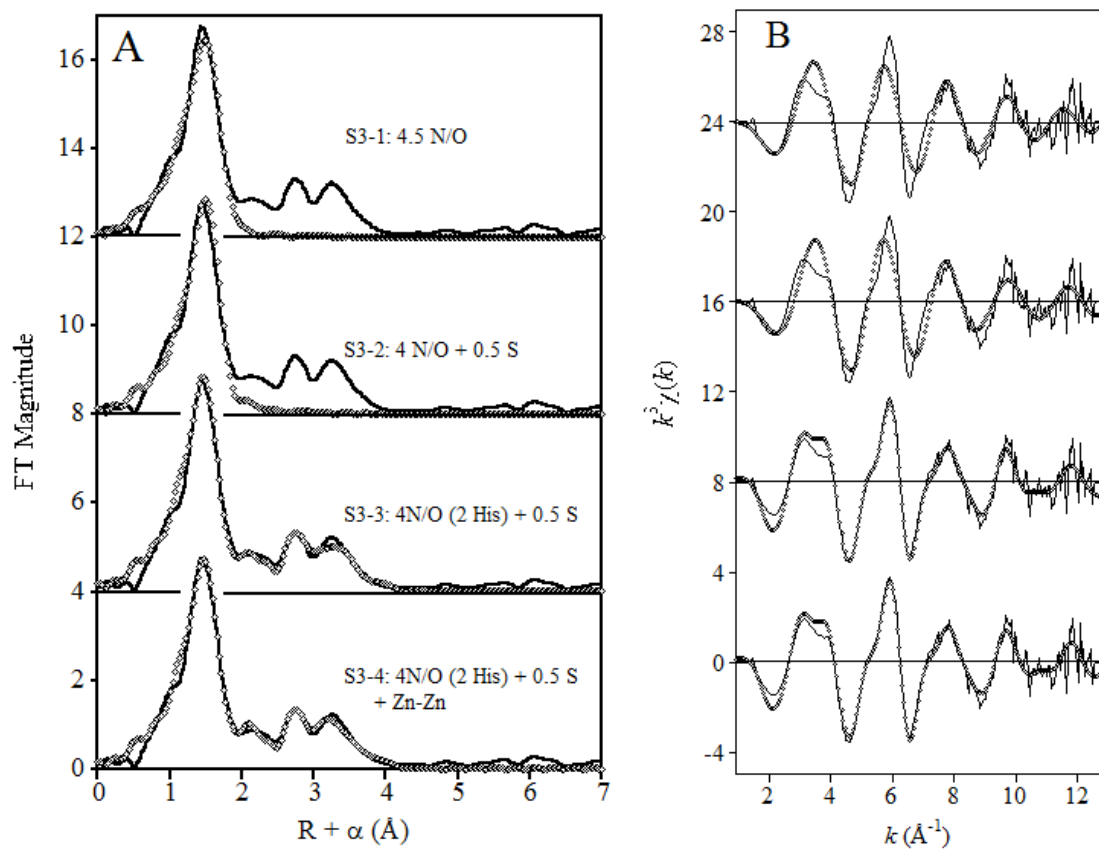

**Figure S3.** Fourier transforms (A) of  $k^3$ -weighted EXAFS (B) for 2Zn-BcII (solid lines), and corresponding curve fits (open symbols) from Table S6.

**Table S3.** Detailed EXAFS curve fitting results for 2Zn-BcII.<sup>a</sup>

| Fit  | Model                                             | Zn-N/O     | Zn-S       | Zn-His <sup>b</sup>                            | Zn-Zn      | R <sub>f</sub> <sup>c</sup> | R <sub>u</sub> <sup>c</sup> |
|------|---------------------------------------------------|------------|------------|------------------------------------------------|------------|-----------------------------|-----------------------------|
| S3-1 | 4.5 N/O                                           | 2.06 (6.4) |            |                                                |            | 96                          | 214                         |
| S3-2 | 4 N/O + 0.5 S                                     | 2.03 (5.9) | 2.27 (6.4) |                                                |            | 57                          | 206                         |
| S3-3 | 4 N/O (2His) + 0.5 S <sup>d</sup>                 | 2.03 (5.8) | 2.27 (6.0) | 2.93 (0.6), 3.17 (1.4)<br>4.09 (14), 4.43 (16) |            | 19                          | 89                          |
| S3-4 | 4 N/O (2His) + 0.5 S<br>+ Zn-Zn <sup>e</sup>      | 2.03 (6.3) | 2.27 (2.6) | 2.90 (3.1), 3.18 (5.8)<br>4.08 (11), 4.43 (15) | 3.42 (8.3) | 10                          | 71                          |
| S3-5 | 4 N/O (2His) + 0.5 S<br>+ 0.91 Zn-Zn <sup>f</sup> | 2.03 (6.0) | 2.27 (2.5) | 2.91 (3.0), 3.18 (5.7)<br>4.08 (11), 4.42 (16) | 3.41 (8.0) | 10                          | 70                          |

<sup>a</sup> Distances (Å) and disorder parameters (in parentheses,  $\sigma^2$  ( $10^{-3}$  Å<sup>2</sup>)) shown derive from integer or half-integer coordination number fits to filtered EXAFS data [ $k = 1.5$ - $12.5$  Å<sup>-1</sup>;  $R = 0.7$ - $2.3$  Å (Fits 1-2) or  $0.2$ - $4.0$  Å (Fits 3-5)].

<sup>b</sup> Multiple scattering paths represent combined paths, as described previously (see Materials and Methods).

<sup>c</sup> Goodness of fit (R<sub>f</sub> for fits to filtered data; R<sub>u</sub> for fits to unfiltered data) defined as

$$1000 * \frac{\sum_{i=1}^N \{ [\text{Re}(\chi_{i,obs})^2 + \text{Im}(\chi_{i,obs})^2] - [\text{Re}(\chi_{i,calc})^2 + \text{Im}(\chi_{i,calc})^2] \}}{\sum_{i=1}^N \{ \text{Re}(\chi_{i,obs})^2 + \text{Im}(\chi_{i,obs})^2 \}}$$

<sup>d</sup> Addition of a Zn-C scattering path (0.5 C/Zn) to the parameters of this fit led to a refined Zn-C distance of 2.49 Å ( $\sigma^2 = 10 \times 10^{-3}$  Å<sup>2</sup>) and minimal improvement in fit residual to R<sub>f</sub> = 16.

<sup>e</sup> Addition of a Zn-C scattering path (0.5 C/Zn) to the parameters of this fit led to a refined Zn-C distance of 2.50 Å ( $\sigma^2 = 1.3 \times 10^{-3}$  Å<sup>2</sup>) and minor improvement in fit residual to R<sub>f</sub> = 9.

<sup>f</sup> This fit allowed the Zn-Zn coordination number to float (refining to a value of 0.91), as well as  $R$  and  $\sigma^2$ .

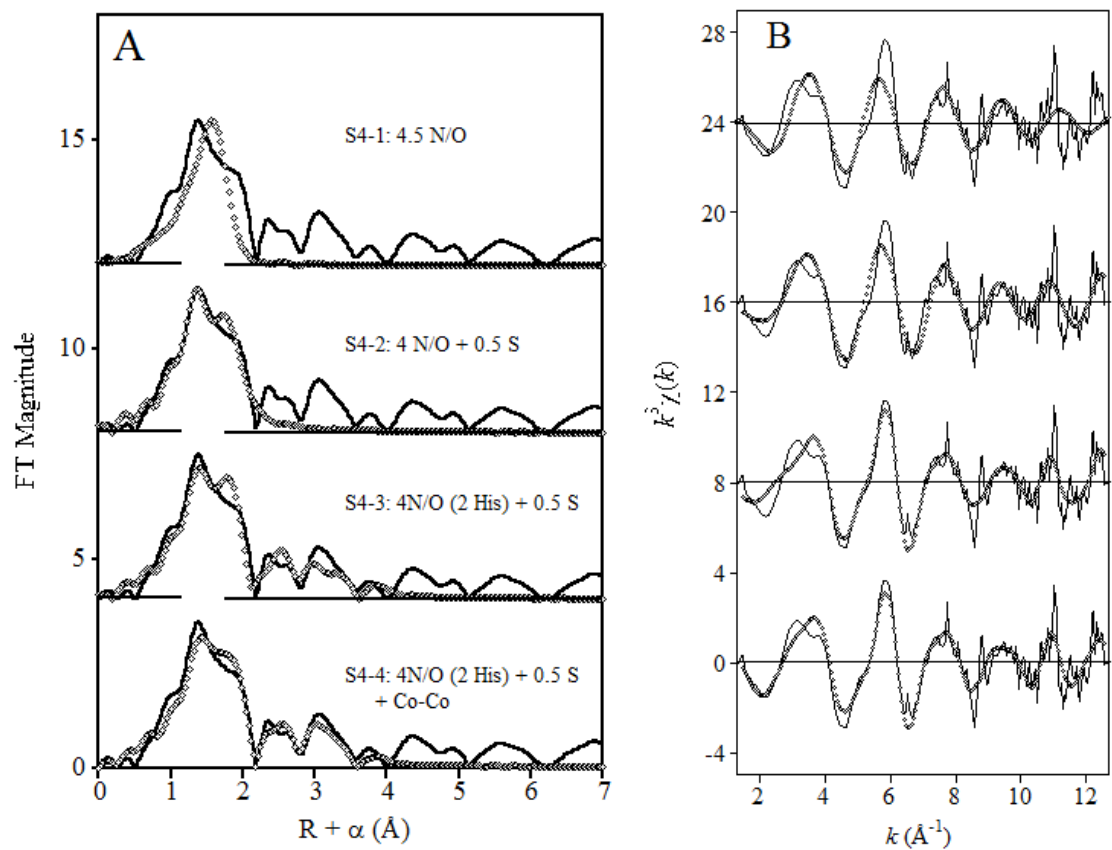

**Figure S4.** Fourier transforms (A) of  $k^3$ -weighted EXAFS (B) for 0.5Co-BcII (solid lines), and corresponding curve fits (open symbols) from Table S1.

**Table S4.** Detailed EXAFS curve fitting results for 0.5Co-BcII.<sup>a</sup>

| Fit  | Model                                             | Co-N/O     | Co-S       | Co-His <sup>b</sup>                             | Co-Co      | R <sub>f</sub> <sup>c</sup> | R <sub>u</sub> <sup>c</sup> |
|------|---------------------------------------------------|------------|------------|-------------------------------------------------|------------|-----------------------------|-----------------------------|
| S4-1 | 4.5 N/O                                           | 2.10 (7.4) |            |                                                 |            | 152                         | 384                         |
| S4-2 | 4 N/O + 0.5 S                                     | 2.02 (8.5) | 2.30 (0.8) |                                                 |            | 32                          | 255                         |
| S4-3 | 4 N/O (2His) + 0.5 S <sup>d</sup>                 | 2.02 (8.4) | 2.30 (0.9) | 2.89 (4.2), 3.31 (20)<br>4.08 (6.4), 4.25 (9.5) |            | 125                         | 180                         |
| S4-4 | 4 N/O (2His) + 0.5 S<br>+ Co-Co <sup>d</sup>      | 2.03 (6.9) | 2.30 (1.7) | 2.94 (4.2), 3.25 (15)<br>4.03 (12), 4.28 (18)   | 3.56 (8.8) | 76                          | 134                         |
| S4-5 | 4 N/O (2His) + 0.5 S<br>+ 0.15 Co-Co <sup>e</sup> | 2.03 (6.2) | 2.30 (1.3) | 2.93 (4.0), 3.26 (13)<br>4.03 (12), 4.29 (17)   | 3.56 (8.0) | 83                          | 144                         |

<sup>a</sup> Distances (Å) and disorder parameters (in parentheses,  $\sigma^2$  ( $10^{-3}$  Å<sup>2</sup>)) shown derive from integer or half-integer coordination number fits to filtered EXAFS data [ $k = 1.5-12.5$  Å<sup>-1</sup>;  $R = 0.7-2.3$  Å (fits 1-2) or 0.2-4.2 Å (fits 3-5)].

<sup>b</sup> Multiple scattering paths represent combined paths, as described previously (see Materials and Methods).

<sup>c</sup> Goodness of fit (R<sub>f</sub> for fits to filtered data; R<sub>u</sub> for fits to unfiltered data) defined as

$$1000 * \frac{\sum_{i=1}^N \{[\text{Re}(\chi_{i,obs})^2 + \text{Im}(\chi_{i,obs})^2] - [\text{Re}(\chi_{i,calc})^2 + \text{Im}(\chi_{i,calc})^2]\}}{\sum_{i=1}^N \{[\text{Re}(\chi_{i,obs})^2 + \text{Im}(\chi_{i,obs})^2]\}}$$

<sup>d</sup> Inclusion of a Co-C scattering path (0.5 C/Co), along with the parameters of this fit, led to a refined Co-C distance of 2.50 Å ( $\sigma^2 = 0.3 \times 10^{-3}$  Å<sup>2</sup>), with a modest decrease in fit residual to R<sub>f</sub> = 113.

<sup>e</sup> This fit allowed the Co-Co coordination number to float (refining to a value of 0.15), as well as  $R$  and  $\sigma^2$ .



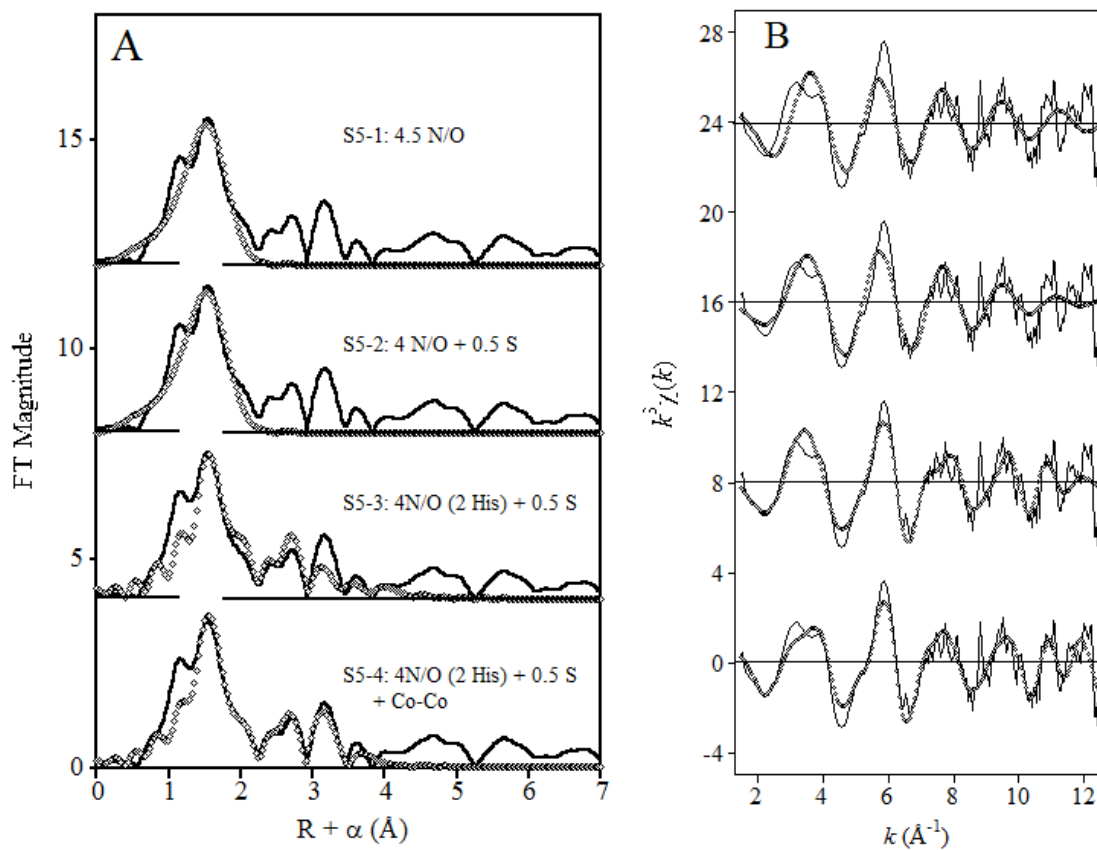

**Figure S5.** Fourier transforms (A) of  $k^3$ -weighted EXAFS (B) for 1Co-BcII (solid lines), and corresponding curve fits (open symbols) from Table S2.

**Table S5.** Detailed EXAFS curve fitting results for 1Co-BcII.<sup>a</sup>

| Fit  | Model                                             | Co-N/O     | Co-S       | Co-His <sup>b</sup>                           | Co-Co      | R <sub>f</sub> <sup>c</sup> | R <sub>u</sub> <sup>c</sup> |
|------|---------------------------------------------------|------------|------------|-----------------------------------------------|------------|-----------------------------|-----------------------------|
| S5-1 | 4.5 N/O                                           | 2.11 (7.4) |            |                                               |            | 124                         | 384                         |
| S5-2 | 4 N/O + 0.5 S                                     | 2.03 (8.7) | 2.30 (4.8) |                                               |            | 47                          | 355                         |
| S5-3 | 4 N/O (2His) + 0.5 S <sup>d</sup>                 | 2.03 (7.7) | 2.30 (5.0) | 2.95 (2.0), 3.27 (20)<br>4.02 (23), 4.28 (13) |            | 111                         | 235                         |
| S5-4 | 4 N/O (2His) + 0.5 S<br>+ Co-Co <sup>d</sup>      | 2.03 (6.1) | 2.30 (3.7) | 2.94 (2.2), 3.25 (14)<br>4.02 (10), 4.28 (16) | 3.55 (6.0) | 63                          | 177                         |
| S5-5 | 4 N/O (2His) + 0.5 S<br>+ 0.33 Co-Co <sup>e</sup> | 2.02 (5.5) | 2.30 (3.0) | 2.94 (1.6), 3.27 (13)<br>4.02 (11), 4.28 (15) | 3.55 (5.6) | 60                          | 170                         |

<sup>a</sup> Distances (Å) and disorder parameters (in parentheses,  $\sigma^2$  ( $10^{-3}$  Å<sup>2</sup>)) shown derive from integer or half-integer coordination number fits to filtered EXAFS data [ $k = 1.5$ - $12.5$  Å<sup>-1</sup>;  $R = 0.7$ - $2.3$  Å (fits 1-2) or  $0.2$ - $4.2$  Å (fits 3-5)].

<sup>b</sup> Multiple scattering paths represent combined paths, as described previously (see Materials and Methods).

<sup>c</sup> Goodness of fit (R<sub>f</sub> for fits to filtered data; R<sub>u</sub> for fits to unfiltered data) defined as

$$1000 * \frac{\sum_{i=1}^N \{ [\text{Re}(\chi_{i,obs})^2 + \text{Im}(\chi_{i,obs})^2] - [\text{Re}(\chi_{i,calc})^2 + \text{Im}(\chi_{i,calc})^2] \}}{\sum_{i=1}^N \{ \text{Re}(\chi_{i,obs})^2 + \text{Im}(\chi_{i,obs})^2 \}}$$

<sup>d</sup> Inclusion of a Co-C scattering path (0.5 C/Co), along with the parameters of this fit, led to a refined Co-C distance of  $2.53$  Å ( $\sigma^2 = 0.1 \times 10^{-3}$  Å<sup>2</sup>), with a modest decrease in fit residual to R<sub>f</sub> = 100.

<sup>e</sup> This fit allowed the Co-Co coordination number to float (refining to a value of 0.33), as well as  $R$  and  $\sigma^2$ .

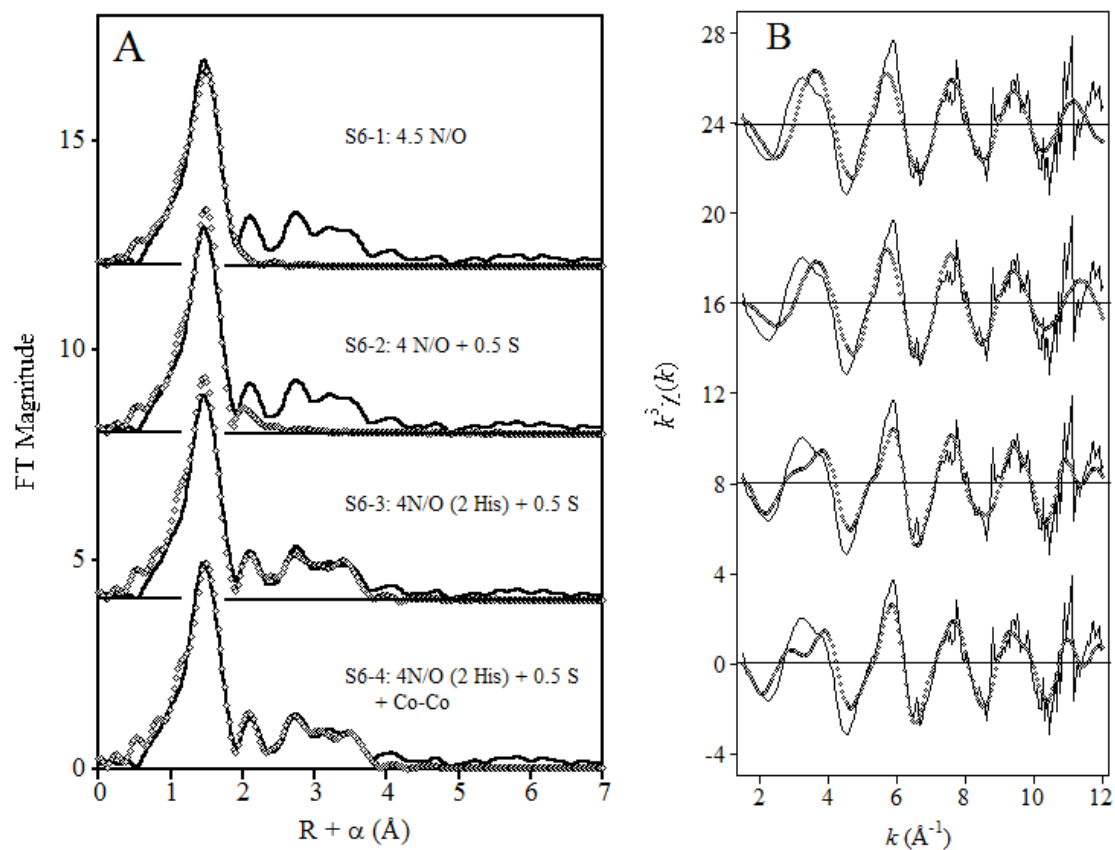

**Figure S6.** Fourier transforms (A) of  $k^3$ -weighted EXAFS (B) for CoCo-BcII (solid lines), and corresponding curve fits (open symbols) from Table S3.

**Table S6.** Detailed EXAFS curve fitting results for CoCo-BcII.<sup>a</sup>

| Fit  | Model                                             | Co-N/O     | Co-S       | Co-His <sup>b</sup>                             | Co-Co      | R <sub>f</sub> <sup>c</sup> | R <sub>u</sub> <sup>c</sup> |
|------|---------------------------------------------------|------------|------------|-------------------------------------------------|------------|-----------------------------|-----------------------------|
| S6-1 | 4.5 N/O                                           | 2.14 (5.1) |            |                                                 |            | 119                         | 309                         |
| S6-2 | 4 N/O + 0.5 S                                     | 2.09 (1.8) | 2.31 (3.7) |                                                 |            | 92                          | 288                         |
| S6-3 | 4 N/O (2His) + 0.5 S <sup>d</sup>                 | 2.09 (2.6) | 2.31 (1.5) | 2.95 (5.8), 3.19 (16)<br>4.13 (6.9), 4.32 (6.6) |            | 172                         | 221                         |
| S6-4 | 4 N/O (2His) + 0.5 S<br>+ Co-Co <sup>e</sup>      | 2.09 (1.3) | 2.31 (5.4) | 2.93 (1.8), 3.19 (14)<br>4.08 (14), 4.32 (12)   | 3.55 (5.4) | 125                         | 202                         |
| S6-5 | 4 N/O (2His) + 0.5 S<br>+ 0.96 Co-Co <sup>f</sup> | 2.09 (1.2) | 2.31 (5.2) | 2.93 (1.7), 3.19 (12)<br>4.08 (13), 4.31 (12)   | 3.55 (5.0) | 120                         | 198                         |

<sup>a</sup> Distances (Å) and disorder parameters (in parentheses,  $\sigma^2$  ( $10^{-3}$  Å<sup>2</sup>)) shown derive from integer or half-integer coordination number fits to filtered EXAFS data [ $k = 1.5-12.4$  Å<sup>-1</sup>;  $R = 0.7-2.3$  Å (fits 1-2) or 0.2-4.2 Å (fits 3-5)].

<sup>b</sup> Multiple scattering paths represent combined paths, as described previously (see Materials and Methods).

<sup>c</sup> Goodness of fit (R<sub>f</sub> for fits to filtered data; R<sub>u</sub> for fits to unfiltered data) defined as

$$1000 * \frac{\sum_{i=1}^N \{[\text{Re}(\chi_{i,obs})^2 + \text{Im}(\chi_{i,obs})^2] - [\text{Re}(\chi_{i,calc})^2 + \text{Im}(\chi_{i,calc})^2]\}}{\sum_{i=1}^N \{[\text{Re}(\chi_{i,obs})^2 + \text{Im}(\chi_{i,obs})^2]\}}$$

<sup>d</sup> Addition of a Co-C scattering path (0.5 C/Co) to the parameters of this fit led to a refined Co-C distance of 2.47 Å ( $\sigma^2 = 1.9 \times 10^{-3}$  Å<sup>2</sup>), with a minimal decrease in fit residual to R<sub>f</sub> = 168.

<sup>e</sup> Addition of a Co-C scattering path (0.5 C/Co) to the parameters of this fit led to a refined Co-C distance of 2.48 Å ( $\sigma^2 = 1.0 \times 10^{-3}$  Å<sup>2</sup>), with a minimal decrease in fit residual to R<sub>f</sub> = 115.

<sup>f</sup> This fit allowed the Co-Co coordination number to float (refining to a value of 0.96), as well as  $R$  and  $\sigma^2$ .
